# Supplementary material for: Increased Viral Dissemination in the Brain and Lethality in MCMV-Infected, Dicer-Deficient Neonates
Source: Viruses. 2015 May 6;7(5):2308–20. doi: 10.3390/v7052308 (PMC4452907; doi:10.3390/v7052308)

## Legends to supplementary figures.

**Suppl. Fig. 1. Low weight gain of MCMV-infected neonates. A.** Time course analysis of the weight (expressed as a % of that measured at day 0) of control (Dicer <sup>+/+</sup> plain line) or Dicer-deficient (Dicer <sup>d/d</sup> dotted line) neonates following MCMV injection. As controls, the weight of uninfected animals is also shown (in blue). **B.** Time course analysis of the weight (expressed as a % of that measured at day 0) of control (Dicer <sup>+/+</sup>, plain line) or Dicer-floxed (Dicer <sup>flox/flox</sup>, dotted line) neonates following MCMV-Cre injection.

**Suppl. Fig. 2. Increased viral replication in Dicer d/d neonates. A-B.** Time-course analysis of luminescence (expressed in Log photons/sec or p/s) quantified upon MCMV-Luc injection in 12 h old (panel A) or 24 h old (panel B) neonates. Wild-type control (Dicer <sup>+/+</sup>) are depicted in yellow), heterozygotes (Dicer <sup>+/d</sup>) in red and mutants (Dicer <sup>d/d</sup>) in blue). **C.** Comparison of the luciferase quantified at day 14 in mice from 3 independent experiments. \* p<0.05.

**Suppl. Fig. 3. MCMV genome quantification by qPCR in the brain of neonates 12 days post-infection.** Controls (Dicer <sup>+/+</sup>) are depicted as blue triangles; Dicer-deficient (Dicer <sup>d/d</sup>) as red dots.

A.

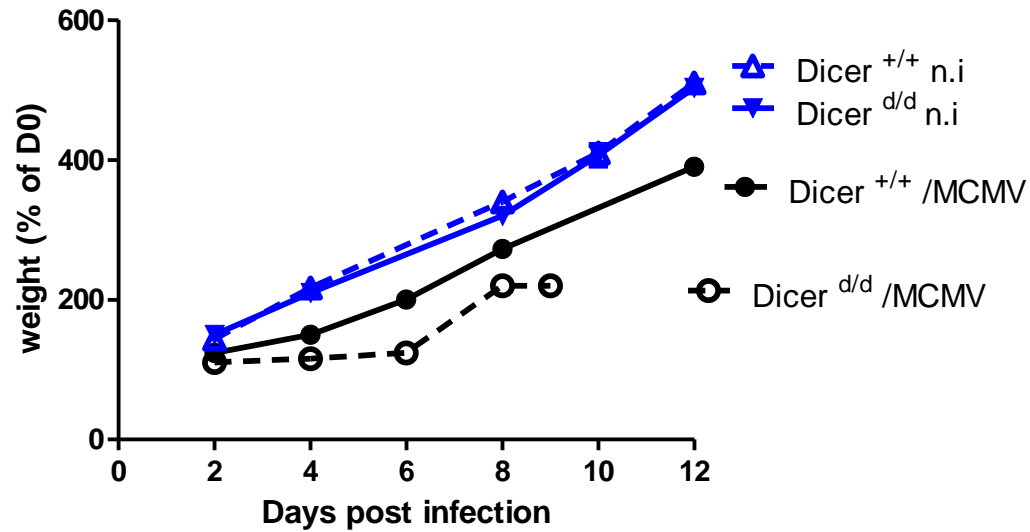

B.

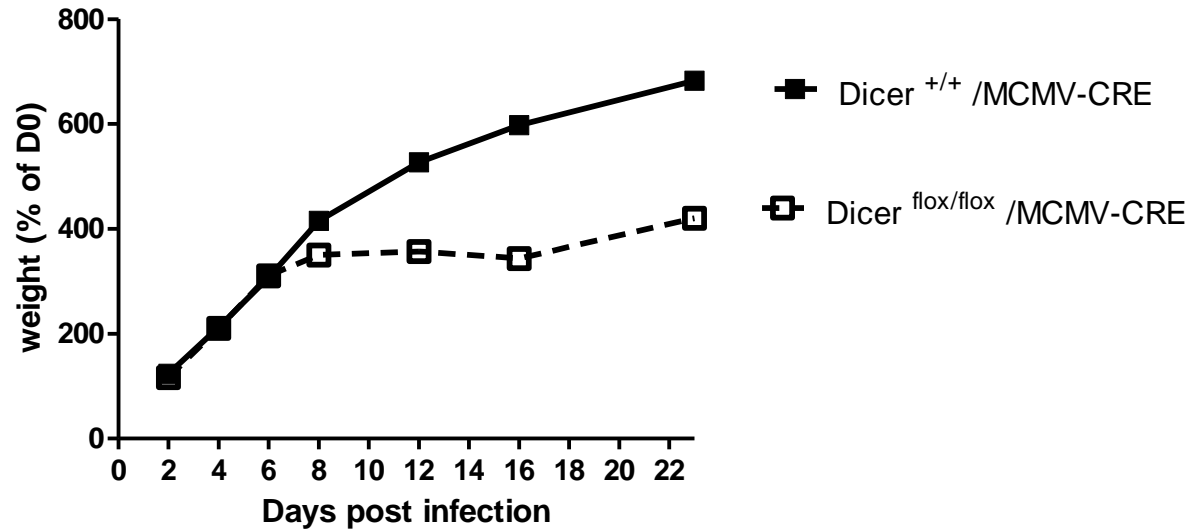

Suppl. Fig. 1

**A.**

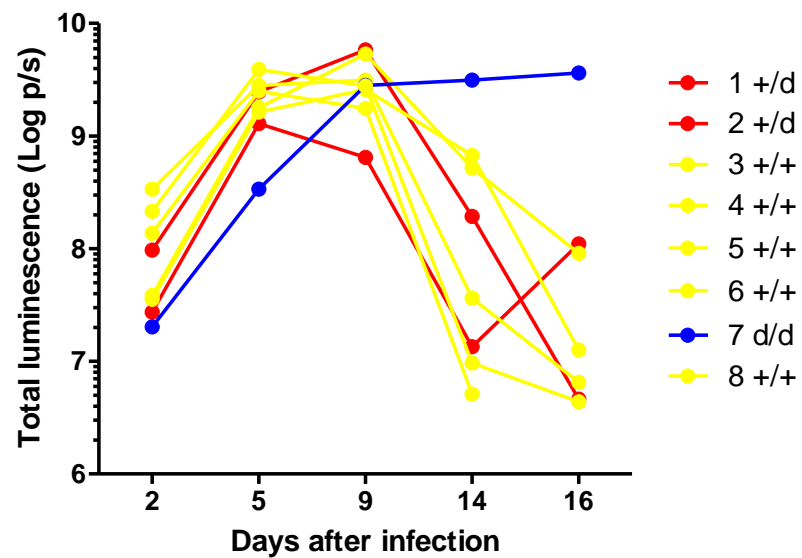

**B.**

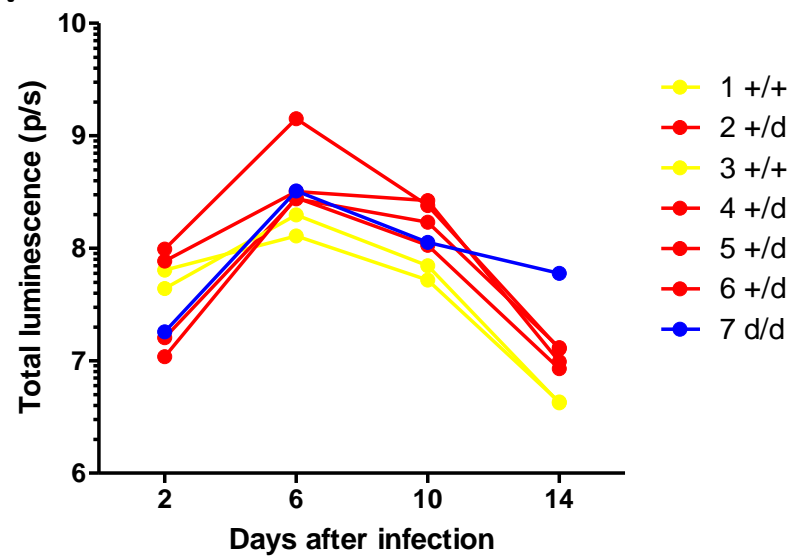

**C.**

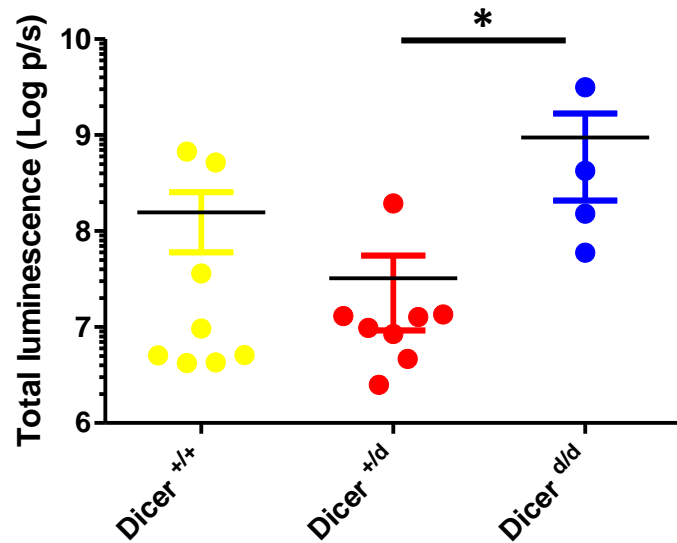

Suppl. Fig. 2

Suppl. Fig. 3

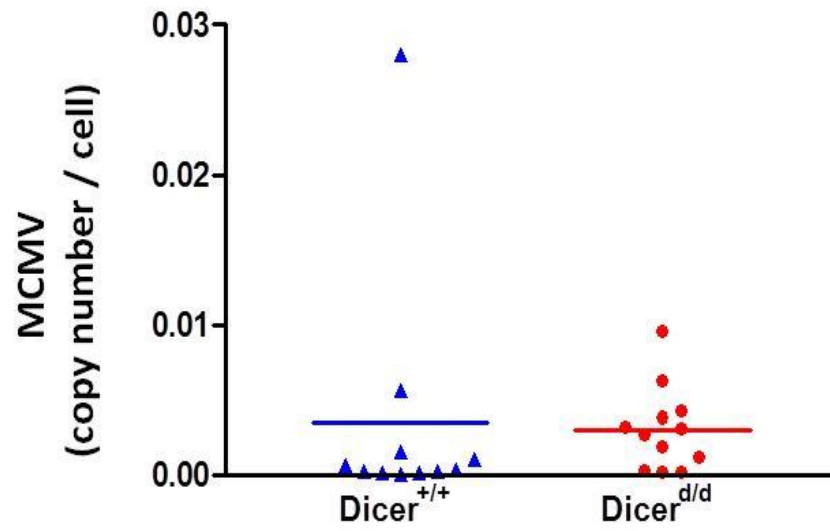

Supplement: Supplementary File 1 [file viruses-07-02308-s001.pdf]
